# Supplementary material
Source: PubMed Central journal article supplement (PMC3191977)

**Supplementary figure. Characterization of growth curves of the *nrd* mutants in aerobic and anaerobic conditions.** Representative growth curves of wild-type PAO1 (circles), *nrdJ* (squares) and *nrdD* (diamonds) mutants grown aerobically (panels A, B, C) or anaerobically (panels E, F, G). Growth curves for wt (left panels),  $\Delta nrdJ$  (middle panels), and  $\Delta nrdD$  (right panels) are shown in the presence or absence of hydroxyurea (HU) and/or 5'-deoxyadenosylcobalamin (AdoCbl). Letters on the right of each panel indicate which RNR might be functional under the different growth conditions. Numbers (1-2 in panel A, and 1-4 in panel D) indicate samples analyzed for NrdJ expression by the Western-blots shown in the insert figures.

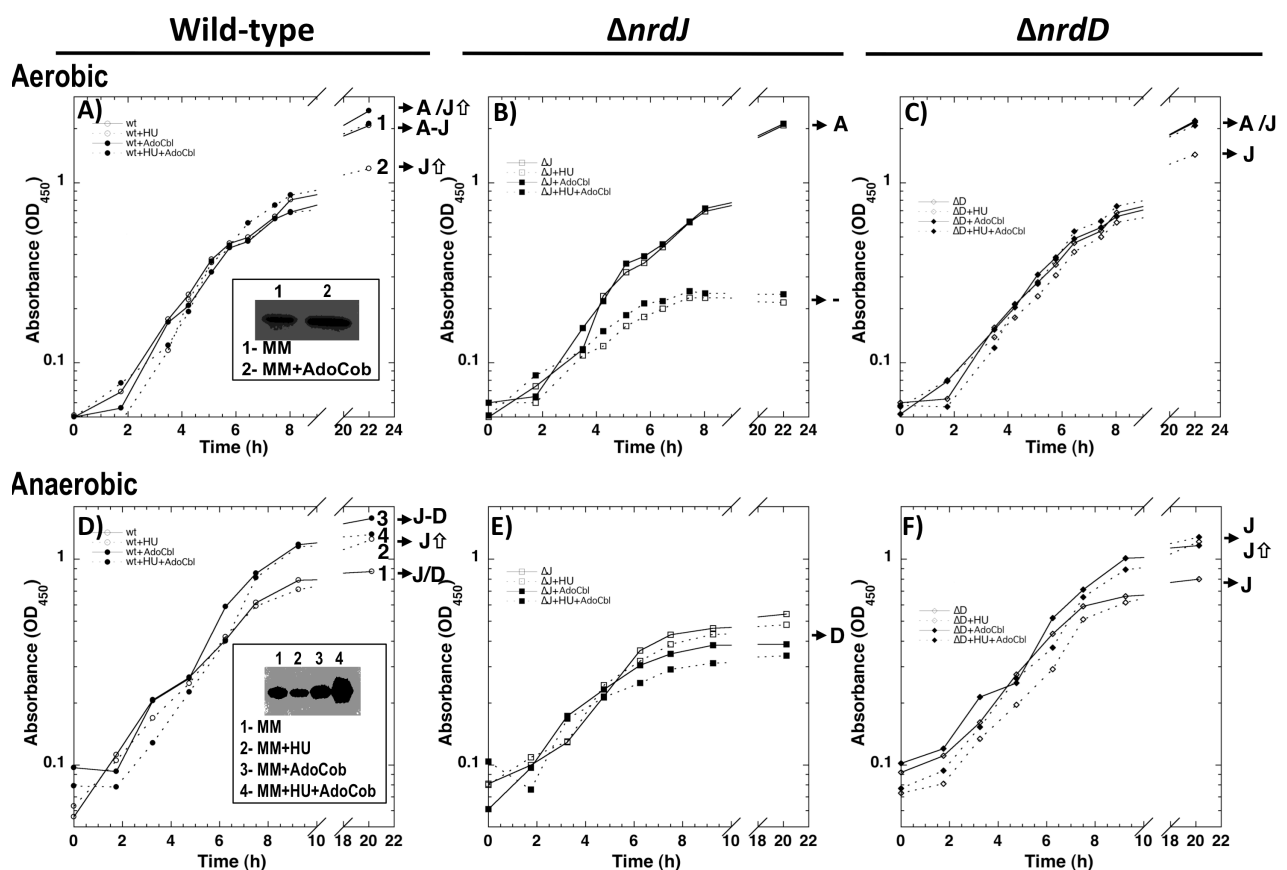

Supplement: supp_79_7_2663__1.pdf [file supp_79_7_2663__1.pdf]
